# Supplementary material for: The Ups and Downs of Cognitive Function: Neuroticism and Negative Affect Drive Performance Inconsistency
Source: Oxford University Press journal article supplement (doi:10.1093/geronb/gby032), 2018-03-24
Supplement: gby032_suppl_supplementary-material.docx [file gby032_suppl_supplementary-material.docx]

| Intercorrelations, Means, and Standard Deviations of Response Time Inconsistency Variables and Mean Response Time. | | | | | | | | | | | | | | | | | | |
| --- | --- | --- | --- | --- | --- | --- | --- | --- | --- | --- | --- | --- | --- | --- | --- | --- | --- | --- |
|  | 1 | 2 | 3 | 4 | 5 | 6 | 7 | 8 | 9 | 10 | 11 | 12 | 13 | 14 | 15 | 16 | Mean | STD | |
| 1. RawISD (AB) | - |  |  |  |  |  |  |  |  |  |  |  |  |  |  |  | 234.78 | 147.94 | |
| 2. ResISD (AB) | 0.99* | - |  |  |  |  |  |  |  |  |  |  |  |  |  |  | 224.54 | 140.67 | |
| 3. CoV (AB) | 0.80* | 0.79* | - |  |  |  |  |  |  |  |  |  |  |  |  |  | 0.33 | 0.10 | |
| 4. Mean (AB) | 0.89* | 0.89* | 0.49* | - |  |  |  |  |  |  |  |  |  |  |  |  | 670.59 | 266.98 | |
| 5. RawISD (LR) | 0.56* | 0.56* | 0.36* | 0.59* | - |  |  |  |  |  |  |  |  |  |  |  | 225.70 | 155.52 | |
| 6. ResISD (LR) | 0.56* | 0.57* | 0.36* | 0.59* | 0.99* | - |  |  |  |  |  |  |  |  |  |  | 213.65 | 150.69 | |
| 7. CoV (LR) | 0.37* | 0.37* | 0.40* | 0.30* | 0.82* | 0.80* | - |  |  |  |  |  |  |  |  |  | 0.28 | 0.10 | |
| 8. Mean (LR) | 0.62* | 0.63* | 0.28* | 0.75* | 0.89* | 0.89* | 0.51* | - |  |  |  |  |  |  |  |  | 741.94 | 293.72 | |
| 9. RawISD (BS) | 0.33* | 0.34* | 0.30* | 0.31* | 0.35* | 0.35* | 0.35* | 0.29* | - |  |  |  |  |  |  |  | 476.23 | 194.11 | |
| 10. ResISD (BS) | 0.32* | 0.33* | 0.30* | 0.30* | 0.34* | 0.34* | 0.34* | 0.27* | 0.99* | - |  |  |  |  |  |  | 461.83 | 188.68 | |
| 11. CoV (BS) | 0.04 | 0.05 | 0.20* | -0.06 | 0.11 | 0.11 | 0.20* | -0.01 | 0.72* | 0.72* | - |  |  |  |  |  | 0.36 | 0.09 | |
| 12. Mean (BS) | 0.45* | 0.45* | 0.25* | 0.52* | 0.40* | 0.39* | 0.31* | 0.42* | 0.79* | 0.79* | 0.19* | - |  |  |  |  | 1301.16 | 418.76 | |
| 13. RawISD (LN) | 0.27* | 0.28* | 0.24* | 0.28* | 0.31* | 0.30* | 0.31* | 0.26* | 0.60* | 0.60* | 0.24* | 0.62* | - |  |  |  | 440.51 | 205.73 | |
| 14. ResISD (LN) | 0.24* | 0.24* | 0.21* | 0.26 | 0.31 | 0.3 | 0.31 | 0.26* | 0.63* | 0.62* | 0.27* | 0.63* | 0.97* | - |  |  | 412.60 | 191.67 | |
| 15. CoV (LN) | 0.05 | 0.05 | 0.17* | -0.01 | 0.09 | 0.09 | 0.18* | 0.01 | 0.33* | 0.32* | 0.37* | 0.12* | 0.72* | 0.67* | - |  | 0.35 | 0.10 | |
| 16. Mean (LN) | 0.39* | 0.40* | 0.20* | 0.49* | 0.37* | 0.36* | 0.27* | 0.40* | 0.56* | 0.55* | -0.01 | 0.84* | 0.77* | 0.77* | 0.17* | - | 1227.20 | 452.88 | |
| *Note.* An asterisk indicates that the 95% confidence interval for the correlation does not include zero.  AB = above or below, location task; LR = left or right, orientation task; BS = bigger or smaller, size task; LN = living or non-living, existence task. | | | | | | | | | | | | | | | | | | |
